# Supplementary material
Source: publisher figshare collection journal article supplement (https://gsajournals.figshare.com/ndownloader/files/13174529)
Supplement: Supplementary file 1 [file 13174529]

**Table S1.KGB-1 tissue-specific activation reduces resistance to *Pseudomonas aeruginosa* infection. All experiments**

| **Strain** | **TD50a (days)** | | **N** | | **p-valueb** |
| --- | --- | --- | --- | --- | --- |
|  | **EV** | **vhp-1** | **EV** | **vhp-1** |  |
| N2 (*wt*) | 2.65 | 1.75 | 103 | 126 | *** |
| N2 | 3.96 | 3.28 | 121 | 141 | * |
| N2c | 3.19 | 2.22 | 73 | 77 | *** |
| N2*; cdc-25.1(RNAi)*d | 3.96 | 3.06 | 106 | 104 | *** |
| N2 | 2.89 | 2.08 | 151 | 209 | *** |
| *kgb-1(km21)* | 1.5 | 2.03 | 78 | 101 | *** |
| *kgb-1* | 2.62 | 3.83 | 148 | 69 | *** |
| *kgb-1c* | 2.06 | 2.00 | 20 | 62 | n.s. |
| *kgb-1; cdc-25.1(RNAi)* | 2.53 | 3.71 | 52 | 57 | *** |
| *kgb-1* | 1.78 | 1.97 | 146 | 100 | * |
| *sid-1(qt9)* (RNAi defective) | 3.18 | 3.16 | 104 | 104 | n.s. |
| Neuronal *kgb-1* | 2.69 | 1.48 | 73 | 93 | *** |
| Neuronal *kgb-1* | 2.66 | 2.41 | 114 | 91 | *** |
| Neuronal *kgb-1c* | 4.55 | 2.94 | 59 | 81 | *** |
| Neuronal *kgb-1; cdc-25.1(RNAi)* | 3.92 | 2.19 | 38 | 73 | *** |
| AGD637 (neuronal SID-1) | 2.38 | 1.05 | 132 | 233 | *** |
| Muscle *kgb-1* | 3.03 | 1.06 | 134 | 146 | *** |
| Muscle *kgb-1* | 4.16 | 3.18 | 126 | 190 | *** |
| Muscle *kgb-1c* | 4.21 | 2.16 | 72 | 39 | *** |
| Muscle *kgb-1; cdc-25.1(RNAi)* | 3.80 | 1.82 | 80 | 86 | *** |
| Intestinal *kgb-1* | 3.14 | 3.18 | 105 | 145 | n.s. |
| Intestinal *kgb-1* | 3.74 | 3.78 | 119 | 126 | n.s. |
| Intestinal *kgb-1c* | 3.92 | 2.77 | 53 | 62 | ** |
| MGH167 (intestinal SID-1) | 2.77 | 0.92 | 130 | 218 | *** |
| Epidermal *kgb-1* | 2.36 | 3.07 | 102 | 113 | *** |
| Epidermal *kgb-1c* | 2.80 | 2.69 | 39 | 73 | n.s. |

a TD50 was calculated using Kaplan-Meier analysis.

b Asterisks represent differences in survival upon *vhp-1* knockdown compared to EV controls (*p<0.05, **p<0.01, ***p<0.0001); black denotes decreased survival (the norm for KGB-1 activation in adults); red, increased survival (when detrimental effects of KGB-1 are missing, thought to depend on PMK-1 activation).

c Prolonged RNAi exposure (L4 to day 3 adults), instead of the standard L4 to D2 adults.

d Worms were rendered sterile by cdc-25.1 RNAi feeding during development, disrupting germline proliferation.
